# Detection of Major Depressive Disorder Using Vocal Acoustic Analysis and Machine Learning

Caroline Wanderley Espinola<sup>1,2</sup>, Juliana Carneiro Gomes<sup>3</sup>, Jessiane Mônica Silva Pereira<sup>3</sup>,  
Wellington Pinheiro dos Santos<sup>1\*</sup>

<sup>1</sup>Departamento de Engenharia Biomédica, Universidade Federal de Pernambuco, Recife, Brazil, E-mails:

[caroline.espinola@ufpe.br](mailto:caroline.espinola@ufpe.br) , [wellington.santos@ufpe.br](mailto:wellington.santos@ufpe.br)

<sup>2</sup> Hospital Ulisses Pernambucano, Recife, Brazil

<sup>3</sup> Núcleo de Engenharia da Computação, Escola Politécnica da Universidade de Pernambuco, Recife, Brazil, E-mails:

[jcg@ecomp.poli.br](mailto:jcg@ecomp.poli.br) , [jmsp@ecomp.poli.br](mailto:jmsp@ecomp.poli.br)

\*Corresponding author: Wellington Pinheiro dos Santos, E-mail: [wellington.santos@ufpe.br](mailto:wellington.santos@ufpe.br) ,

ORCID 0000-0003-2558-6602.

## Abstract

**Purpose** Diagnosis and treatment in psychiatry are still highly dependent on reports from patients and on clinician judgement. This fact makes them prone to memory and subjectivity biases. As for other medical fields, where objective biomarkers are available, there has been an increasing interest in the development of such tools in psychiatry. To this end, vocal acoustic parameters have been recently studied as possible objective biomarkers, instead of otherwise invasive and costly methods. Patients suffering from different mental disorders, such as major depressive disorder (MDD), may present with alterations of speech. These can be described as uninteresting, monotonous and spiritless speech, low voice.

**Methods** Thirty-three individuals (11 males) over 18 years old were selected, 22 of which being previously diagnosed with MDD, and 11 healthy controls. Their speech was recorded in naturalistic settings, during a routine medical evaluation for psychiatric patients, and in different environments for healthy controls. Voices from third parties were removed. The recordings were submitted to a vocal feature extraction algorithm, and to different machine learning classification techniques.

**Results** The results showed that support vector machines (SVM) models provided the greatest classification performances for different kernels, with PUK kernel providing accuracy of 89.14% for the detection of MDD.

**Conclusion** The use of machine learning classifiers with vocal acoustics features has shown to be very promising for the detection of major depressive disorder, but further tests with a larger sample will be necessary to validate our findings.

**Keywords** Major depressive disorder • diagnosis • voice • acoustic parameters • machine learning • support vector machines

---

Caroline Wanderley Espinola (✉) • Wellington Pinheiro dos Santos

Laboratório de Engenharia Biomédica, Universidade Federal de Pernambuco, Recife, PE, Brazil

e-mails: [caroline.espinola@ufpe.br](mailto:caroline.espinola@ufpe.br), [wellington.santos@ufpe.br](mailto:wellington.santos@ufpe.br)

Juliana Carneiro Gomes • Jessiane Mônica Silva Pereira

Núcleo de Engenharia da Computação, Escola Politécnica da Universidade de Pernambuco, Universidade de Pernambuco, Recife, PE, Brazil

e-mails: [jcg@ecomp.poli.br](mailto:jcg@ecomp.poli.br), [jmsp@ecomp.poli.br](mailto:jmsp@ecomp.poli.br)

## Detection of Major Depressive Disorder Using Vocal Acoustic Analysis and Machine Learning

### 1. Introduction

Clinical assessment and treatment in psychiatry currently depend on diagnostic criteria built entirely on expert consensus, instead of relying on objective biomarkers (Bzdok & Meyer-lindenberg, 2018). Such criteria, described in the Diagnostic and Statistical Manual, 5<sup>th</sup> Edition (DSM-5), and in the International Classification of Diseases (ICD-10), are still considered the gold-standard for diagnosis in psychiatry (American Psychiatric Association, 2013). Nevertheless, those diagnostic systems have been criticized due to their absence of clinical predictability and neurological validity (Bzdok & Meyer-lindenberg, 2018), and their poor diagnostic stability (Baca-Garcia et al., 2007). While other medical fields hold markers of disease presence and severity, such as tumor volume measurement and biochemical blood tests, psychiatry still lacks routine objective tests (Bedi et al., 2015; Mundt, Vogel, Feltner, & Lenderking, 2012).

Historically, evaluation and treatment in psychiatry are based on reports from patients and on clinical evaluation (Mundt, Snyder, Cannizzaro, Chappie, & Geralts, 2007). Thus diagnosis and therapeutic decision are extremely sensitive to memory and subjectivity biases (Jiang et al., 2018). Considering this, over the last decades there has been an intense search for biomarkers for diagnosis and follow-up of psychiatric patients (Iwabuchi, Liddle, & Palaniyappan, 2013; Mundt et al., 2012), most of those being expensive and invasive (Higuchi, Tokuno, Nakamura, & Shinohara, 2018). Despite all efforts, instruments for assessment of mental disorders still remain a conundrum (Mundt et al., 2007).

Major depressive disorder (depression) is the most common mental disorder, affecting more than 300 million people worldwide (Sadock, Sadock, & Ruiz, 2017; World Health Organization, 2018). It is also a leading cause of disability and economic burden (Mundt et al., 2007, 2012). The global prevalence of depression was estimated to be 4.4% in 2015 (World Health Organization, 2017), with more women affected than men in a 2:1 ratio (Weinberger et al., 2017). In Brazil the prevalence of depression is currently the fifth largest in the world, 5.8% (World Health Organization, 2017), while its lifetime prevalence can be as high as 16.8% (Miguel, Gentil, & Gattaz, 2011).

Patients suffering from depression may present with low mood, irritability, anhedonia, fatigue, psychomotor retardation, cognitive impairment (difficulty in decision making, poor concentration) and disturbances of somatic functions (insomnia or hypersomnia, appetite disorders, changes in body weight). These symptoms are associated with intense suffering and decline in functioning, and may ultimately lead to suicide (American Psychiatric Association, 2013). Depression is associated with approximately half of all suicides globally (Cummins et al., 2015).

Early depressive symptoms such as psychomotor retardation and cognitive impairment are frequently related to disturbances in speech (Hashim, Wilkes, Salomon, Meggs, & France, 2016). Actually, patterns within depressed speech have been documented years ago (Mundt et al., 2007). In particular, the persistent altered emotional state in depression may affect vocal acoustic properties. As a result, depressive speech has been described by clinicians as monotonous, uninteresting and without energy. These differences could provide the detection of depression through analysis of vocal acoustics of depressed patients (Jiang et al., 2018).

Machine learning is an intensive field of research, with successful applications to solve several problems in health sciences, like breast cancer diagnosis (Cordeiro, Lima, Silva-Filho, & Santos, 2012; Cordeiro, Santos, & Silva-Filho, 2017; Cordeiro, Santos, & Silva-Filho, 2016; Cordeiro, Santos, & Silva-Filho, 2013; de Lima, S. M., da Silva-Filho, A. G., & dos Santos, 2016; Rodrigues et al., 2019; Azevedo et al., 2015; de Santana et al., 2018), Alzheimer's disease diagnosis support based on neuroanatomical features (dos Santos, de Assis, de Souza, Mendes, & de Souza Monteiro, H. S., Alves, 2009; dos Santos, de Assis, de Souza, & Santos Filho, 2008; dos Santos, de Souza, & dos Santos Filho, 2007; Cruz, T., Cruz, T., & Santos, W., 2018), multiple sclerosis diagnosis (Commowick, O., Istace, A., Kain, M.,

## Detection of Major Depressive Disorder Using Vocal Acoustic Analysis and Machine Learning

Laurent, B., Leray, F. & M., ... & Kerbrat, 2018), and many applied neuroscience solutions (da Silva Júnior et al, 2019; de Freitas et al., 2019).

Qualitative changes in speech from people suffering with depression have been reported decades ago (Darby & Hollien, 1977), e.g., reduction in pitch range (Vanello et al., 2012), increased number of pauses (Mundt et al., 2012), slower speech (Faurholt-Jepsen et al., 2016), and reduced intensity or loudness (Hönig, Batliner, Nöth, Schnieder, & Krajewski, 2014).

For the recognition of changes in mood state, prosodic, phonetic and spectral aspects of voice are relevant, in particular fundamental frequency (F0) or pitch, intensity, rhythm, speed, jitter, shimmer, energy distribution between formants, and cepstral features. Among those features, jitter is considered important for mood state recognition due to its ability to identify rapid temporary changes in voice (Maxhuni et al., 2016). Alteration of mel frequency cepstral coefficients (MFCC) are also found in depressed individuals. MFCCs consist of parametrical representation of the speech signal (Hasan, Jamil, Rabbani, & Rahman, 2004) and have been extensively studied as possible features for the detection of major depressive disorder (Cummins, Epps, Sethu, & Krajewski, 2014; Jiang et al., 2018).

In a sample of 57 depressed patients, Cohn et al. (2009) analyzed prosodic and facial expression elements using two machine learning classifiers: support vector machines (SVM) and logistic regression. Their accuracy for the identification of depression was 79-88% for facial expressions, and 79% for prosodic features.

In a study with adolescents, Ooi, Lech, & Brian Allen (2013) used glottal, prosodic and spectral features, and Teager energy operator for the prediction of early symptoms of depression in that age group, and reported accuracy of 73% (sensitivity: 79%; specificity: 67%). In another study with a larger sample of adolescents, Low, Maddage, Lech, Sheeber, & Allen (2011) utilized the above attributes with the addition of cepstral parameters, and submitted to SVM and Gaussian Mixture Models (GMM) classifiers. They described significant differences in classifier performances for detecting depression based on gender: 81-87% for males, and 72-79% for females.

With emphasis on vocal features for the identification of depression, Hönig et al. (2014) used automatic feature selection to study 34 features: spectral (MFCCs, formants F1 to F4), prosodic (pitch, energy, duration, rhythm) and vocal quality or phonetic features (jitter, shimmer, raw jitter, raw shimmer, logarithm harmonics-to-noise ratio, spectral harmonicity and spectral tilt). In agreement with findings from Low et al. (2011), they reported a slightly higher correlation in males ( $r = 0.39$  males vs.  $0.36$  females). This suggests that clinical depression can possibly lead to more significant changes in vocal features in men than in women.

Similarly, Jiang et al. (2017) also noticed gender differences in classifier performances, with superior results in males. In a sample of 170 subjects, they investigated the discriminative power of three classifiers for the detection of depression: SVM, GMM and k-nearest neighbors (kNN). SVM achieved the best results in that study, with accuracy of 80.30% (sens.: 75%; spec.: 85.29%) for males, and 75.96% (sens.: 77.36%; spec.: 74.51%) for females.

Adversely, Higuchi et al. (2018) analyzed pitch (F0), spectral centroid and five attributes of MFCC using polytomous logistic regression for the classification of depression, bipolar disorder and healthy controls. They did not find any difference between genders. Additionally, they reported an overall accuracy of 90.79%, the highest among the studies revised for this work.

Another attribute of study design that might influence the performance of an automated instrument is the type of speech task. Spontaneous speech, e.g., social interactions or interviews tend to yield higher classification performances than reading tasks. This finding suggests that spontaneous speech provides more acoustic variability, improving the recognition of depression (Alghowinem, Goecke, Wagner, & Epps, 2013; Jiang et al., 2017). Moreover, it is likely that

## Detection of Major Depressive Disorder Using Vocal Acoustic Analysis and Machine Learning

depressed individuals can suppress their emotional state during reading tasks, because of the unimportant nature of the read content or their concentration on reading, or even both (Mitra & Shriberg, 2015).

The rest of this work is divided as follows: Section 2 briefly discusses studies related to the identification of depression using voice. Section 2 describes in detail the implementation of a proposed voice-based instrument for the detection of depression. In Section 3 we present and discuss our results. Section 4 states our conclusion and suggestions for future work on this subject.

### 2. Methods

For this study 33 volunteers over 18 years old from both genders were selected and separated into one of the following groups:

- Control group: 11 healthy participants (6 males) were selected through the Self-Reporting Questionnaire (SRQ-20) screening for common mental disorders (Gonçalves, Stein, & Kapczinski, 2008; K. O. B. Santos, Araújo, Pinhoa, & Silva, 2010);
- Depression group: 22 patients with previous diagnosis of major depressive disorder (17 males), in conformity with Hamilton Depression Rating Scale – HAM-D 17 (Hamilton, 1960).

All individuals from the depression group fulfilled DSM-5 diagnostic criteria for major depressive disorder and were diagnosed by an independent professional prior to this study. Data for this group was collected in outpatient settings and psychiatric wards in Hospital das Clínicas, Federal University of Pernambuco, and in Hospital Ulysses Pernambucano, both in Recife, Northeast Brazil. Participants with coexistent neurological disorders or who made professional use of their voices were excluded. The use of validated psychometric scales aimed to verify previous diagnostic consistency and assess clinical severity. All participants have given written consent, and this study was conducted only after approval of a local Research Ethical Board. Table 1 provides a summary of mean age and scale scores for both groups.

For the control group the SRQ-20 cutoff score was 6/7 (K. O. B. Santos et al., 2010), and for the depression group the eligibility criterion was HAM-D score above 7. Consequently, patients suffering from mild to severe depression were included.

TABLE 1. Mean age and rating scale scores

| Group      | Age                      | Rating Scale | Mean Scores              |
|------------|--------------------------|--------------|--------------------------|
| Control    | 30.1 yrs<br>(± 12.6 yrs) | SRQ-20       | 3.00 points<br>(± 1.86)  |
| Depression | 42.9 yrs<br>(± 13 yrs)   | HAM-D 17     | 19.32 points<br>(± 7.36) |

Abbreviations: HAM-D 17: Hamilton Depression Rating Scale; SRQ-20: *Self-Reporting Questionnaire*.

### Acquisitions of voice samples

We used a Tascam™ 16-bit linear PCM recorder at 44.1KHz sampling rate, in WAV format, without compression. Audio acquisitions were made during an interview with a psychiatrist in naturalistic settings, i.e., patients from the depression group were recorded during a routine medical evaluation in an outpatient office or hospital ward. Recordings for the control group were made in different environments (e.g. offices, classrooms, gyms). After each interview, the clinician applied an appropriate rating scale (SRQ-20 or HAM-D 17) to verify diagnostic suitability. No

## Detection of Major Depressive Disorder Using Vocal Acoustic Analysis and Machine Learning

duration limit was set for the recordings. As conversations were thoroughly recorded, voices from the clinician and possible third parties were also acquired and needed to be further removed. The total time recorded was 425.1 minutes (7.09 hours). Figure 1 summarizes the process of data acquisition.

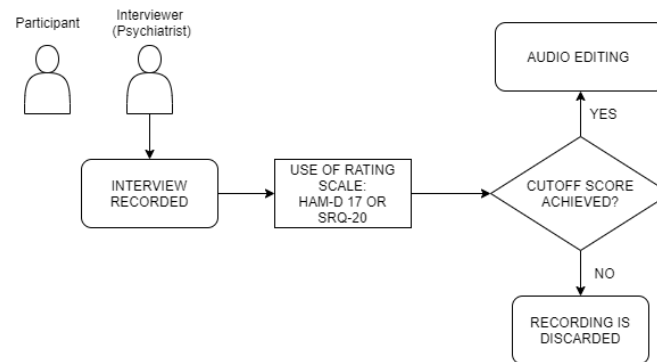

**Fig.1.** Block diagram of voice acquisition

### Audio editing

After voice acquisition, we used Audacity™ audio software to remove voice signals from the interviewer and any potential companion. The edition process was manually made, and yielded 271 minutes of voice signals from participants (4.52h) as follows: 96.9 minutes for the control group, and 174.1 minutes for the depression group. Table 2 provides detailed information for both groups.

TABLE 2. Recording duration after audio editing

| Group      | Number of participants | Total recording duration | Mean recording duration      |
|------------|------------------------|--------------------------|------------------------------|
| Control    | 11                     | 5816s<br>(96.9 min)      | 528s (8.8 min)<br>± 138.7s   |
| Depression | 22                     | 10444s<br>(174.1 min)    | 467,5s (7.8 min)<br>± 213.3s |

### Feature extraction

All recordings were submitted to vocal feature extraction on GNU Octave™, a free open-source signal-processing software. We used rectangular windows, frame length of 10s with 50% overlap. As raw audio data was used, no filtering process was applied. During this stage, we extracted the following 33 features: skewness; kurtosis; zero crossing rates; slope sign changes; variance; standard deviation; mean absolute value; logarithm detector; root mean square; average amplitude change; difference absolute deviation; integrated absolute value; mean logarithm kernel; simple square integral; mean value; third, fourth and fifth moments; maximum amplitude; power spectrum ratio; peak frequency; mean power; mean frequency; median frequency; total power; variance of central frequency; first, second and third spectral moments; Hjorth parameter activity, mobility and complexity; and waveform length.

The choice of the above features relies on their accurate representation of input signals to computational models, because decision making process in machine learning does not depend on human interpretation. Furthermore, these features have already been successfully used for representing other signal types, such as electroencephalography.

## Detection of Major Depressive Disorder Using Vocal Acoustic Analysis and Machine Learning

### Classification

Both classes were balanced by adding artificial instances on Weka™ artificial intelligence environment. This step is important because it avoids computational biases towards the class with more representativeness, in this case the depression class. Features were submitted to experiments with the following ML algorithms on Weka™: multilayer perceptron (MLP), logistic regression, random forest (RF), decision trees, Bayes net, Naïve Bayes, and SVM with different kernels (linear, polynomial kernel, radial basis function or RBF, PUK, and normalized polynomial kernel). All experiments were performed using 10-fold cross-validation. Figure 2 summarizes the steps of our proposed solution.

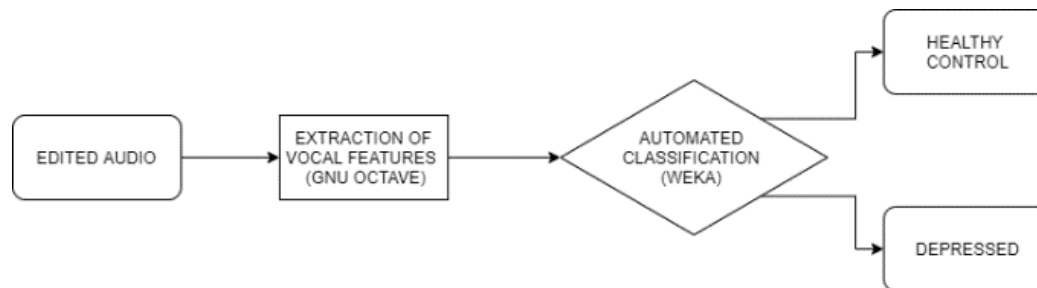

**Fig. 2.** Block diagram of proposed solution

### 3. Results

Experiments were initially made under default settings on Weka™. After this, we tested different setups for all algorithms with adjustable settings (MLP; polynomial kernel and normalized polynomial kernel SVM, SVM PUK kernel, and random forest). Table 3 describes in detail our best results for each ML model.

TABLE 3. Classification performance for machine learning algorithms – control vs. depression

| Model                     | Accuracy      | Kappa         | Sensibility  | Specificity  |
|---------------------------|---------------|---------------|--------------|--------------|
| MLP                       | 81.84%        | 0.6367        | 81.8%        | 81.8%        |
| Random Forest             | 84.91%        | 0.6982        | 84.9%        | 85.0%        |
| Decision Trees            | 74.58%        | 0.4916        | 74.6%        | 74.6%        |
| Logistic Regression       | 68.69%        | 0.3737        | 68.7%        | 69.8%        |
| SVM linear                | 71.87%        | 0.4373        | 71.9%        | 73.5%        |
| SVM 2-Degree Polynomial   | 82.35%        | 0.6471        | 82.4%        | 82.9%        |
| SVM 3-Degree Polynomial   | 85.93%        | 0.7186        | 85.9%        | 86.1%        |
| SVM PUK                   | <b>89.14%</b> | <b>0.7828</b> | <b>89.1%</b> | <b>89.2%</b> |
| SVM normalized Polynomial | 87.19%        | 0.7438        | 87.2%        | 87.2%        |
| SVM RBF                   | 67.69%        | 0.3539        | 67.7%        | 72.0%        |
| Bayes Net                 | 67.09%        | 0.3418        | 67.1%        | 67.7%        |
| Naive Bayes               | 60.01%        | 0.2001        | 60.0%        | 64.4%        |

Abbreviations: MLP: *Multilayer Perceptron*; PUK: *Pearson Universal VII Kernel*; RBF: *Radial Basis Function*; SVM: *Support Vector Machines*.

### 4. Discussion

Through analysis of Table 3 above we notice that classification accuracy varied significantly for SVM (67.69%-89.14%), depending on the kernel used. SVM PUK kernel provided the highest accuracy (89.14%) among all classifiers

## Detection of Major Depressive Disorder Using Vocal Acoustic Analysis and Machine Learning

in this study. The confusion matrix for this kernel is shown in Table 4. SVM normalized polynomial kernel and polynomial kernel achieved accuracy of 87.19% and 85.93% respectively. The greatest performances from different SVM kernels in this dataset supports findings from previous studies in the literature. This suggests the possible superiority of this algorithm for automated classification tasks using vocal acoustic features.

TABLE 4. Confusion matrix for the model with the highest performance (SVM PUK)

|            | Classified as<br>Control | Classified as depression |
|------------|--------------------------|--------------------------|
| Control    | 88.25%                   | 11.75%                   |
| Depression | 9.97%                    | 90.03%                   |

As mentioned earlier, except for the work of Higuchi et al. (2018), we achieved better results than other previously published studies. Our work provided high classification accuracy both for depressed and healthy individuals. However, it is important to note that our small sample size may limit statistical interpretations. Factors that may influence vocal acoustic properties, such as smoking history and pharmacotherapy, were not controlled and represent a limitation. In a prospective study, we aim to control possible confounders and repeat the same experiments with more participants.

### 5. Conclusion

Current psychiatric diagnosis still lacks objective biomarkers, and relies mostly on specialist opinion based on diagnostic manuals. Nevertheless, such diagnostic systems have been heavily criticized due to their absence of correlation with the neurobiology and etiopathogenesis of mental disorders. Among these, depression presents with vocal acoustic alterations that may be used as objective parameters for the identification of this disorder.

Therefore, this study focused on the development of an auxiliary instrument for the diagnosis of depressive disorders. To this end, we extracted vocal acoustic features and performed experiments using different automated classification techniques. Some of the most widely used classifiers were also tested in this work. Our results demonstrate the viability of a machine learning tool for the detection and even screening of major depressive disorder in a cost-effective and non-invasive manner. In future studies we intend to perform the same experiments in a larger sample, as well as with gender-based datasets. We would like to assess if depression unequally affects vocal acoustic properties from men and women and how such differences influence the performance of automated classifiers.

### Acknowledgements

The authors are grateful to the Brazilian research agency CNPq, for the partial financial support of this research.

### Conflict of Interest

All authors declare they have no conflicts of interest.

### Compliance with Ethical Standards

This study was partially funded by the Brazilian research agency CNPq.

## Detection of Major Depressive Disorder Using Vocal Acoustic Analysis and Machine Learning

All procedures performed in studies involving human participants were in accordance with the ethical standards of the institutional and/or national research committee and with the 1964 Helsinki declaration and its later amendments or comparable ethical standards.

### References

- Alghowinem, S., Goecke, R., Wagner, M., & Epps, J. (2013). Detecting Depression: A Comparison Between Spontaneous and Read Speech. *IEEE*, 7547–7551.
- American Psychiatric Association. (2013). *DSM-5 - Manual Diagnóstico e Estatístico de Transtornos Mentais*. Artmed (5.). Porto Alegre: Artmed. <https://doi.org/10.11769780890425596>
- Azevedo, W. W., Lima, S. M., Fernandes, I. M., Rocha, A. D., Cordeiro, F. R., da Silva-Filho, A. G., & dos Santos, W. P. (2015, August). Fuzzy morphological extreme learning machines to detect and classify masses in mammograms. In 2015 IEEE international conference on fuzzy systems (fuzz-IEEE) (pp. 1-8). IEEE.
- Baca-Garcia, E., Perez-Rodriguez, M. M., Basurte-Villamor, I., Fernandez Del Moral, A. L., Jimenez-Arriero, M. A., Gonzalez De Rivera, J. L., ... Oquendo, M. A. (2007). Diagnostic stability of psychiatric disorders in clinical practice. *British Journal of Psychiatry*, 190(MAR.), 210–216. <https://doi.org/10.1192/bjp.bp.106.024026>
- Bedi, G., Carrillo, F., Cecchi, G. A., Slezak, D. F., Sigman, M., Mota, N. B., ... Corcoran, C. M. (2015). Automated analysis of free speech predicts psychosis onset in high-risk youths. *Nature Partner Journals*. <https://doi.org/10.1038/npjjschz.2015.30>
- Bzdok, D., & Meyer-lindenberg, A. (2018). Machine Learning for Precision Psychiatry: Opportunities and Challenges. *Biological Psychiatry: Cognitive Neuroscience and Neuroimaging*, 3, 223–230. <https://doi.org/10.1016/j.bpsc.2017.11.007>
- Cohn, J. F., Kruez, T. S., Matthews, I., Yang, Y., Nguyen, M. H., Padilla, M. T., ... De La Torre, F. (2009). Detecting depression from facial actions and vocal prosody. *Proceedings - 2009 3rd International Conference on Affective Computing and Intelligent Interaction and Workshops, ACII 2009*, (October). <https://doi.org/10.1109/ACII.2009.5349358>
- Commowick, O., Istace, A., Kain, M., Laurent, B., Leray, F., S., & M., ... & Kerbrat, A. (2018). Objective evaluation of multiple sclerosis lesion segmentation using a data management and processing infrastructure. *Scientific Reports*, 8(1), 1–17.
- Cordeiro, F. R., Lima, S. M., Silva-Filho, A. G., & Santos, W. P. (2012). Segmentation of mammography by applying extreme learning machine in tumor detection. In *International Conference on Intelligent Data Engineering and Automated Learning* (pp. 92–100). Springer Berlin Heidelberg.
- Cordeiro, F. R., Santos, W. P., & Silva-Filho, A. G. (2013). Segmentation of mammography by applying GrowCut for mass detection. *Studies in health technology and informatics*, 192, 87-91.
- Cordeiro, F. R., Santos, W. P., & Silva-Filho, A. G. (2016). A semi-supervised fuzzy GrowCut algorithm to segment and classify regions of interest of mammographic images. *Expert Systems with Applications*, 65, 116–126.
- Cordeiro, F. R., Santos, W. P., & Silva-Filho, A. G. (2017). Analysis of supervised and semi-supervised GrowCut applied to segmentation of masses in mammography images. *Computer Methods in Biomechanics and Biomedical Engineering: Imaging & Visualization*, 5(4), 297-315.
- Cruz, T., Cruz, T., & Santos, W. (2018). Detection and classification of lesions in mammographies using neural networks and morphological wavelets. *IEEE Latin America Transactions*, 16(3), 926-932.



## Detection of Major Depressive Disorder Using Vocal Acoustic Analysis and Machine Learning

- Cummins, N., Epps, J., Sethu, V., & Krajewski, J. (2014). Variability compensation in small data: Oversampled extraction of i-vectors for the classification of depressed speech. *ICASSP, IEEE International Conference on Acoustics, Speech and Signal Processing - Proceedings*, 970–974. <https://doi.org/10.1109/ICASSP.2014.6853741>
- Cummins, N., Scherer, S., Krajewski, J., Schnieder, S., Epps, J., & Quatieri, T. F. (2015). A review of depression and suicide risk assessment using speech analysis. *Speech Communication*, 71(April), 10–49. <https://doi.org/10.1016/j.specom.2015.03.004>
- Darby, J. K., & Hollien, H. (1977). Vocal and Speech Patterns of Depressive Patients. *Folia Phoniatica*, 29, 279–291.
- da Silva Júnior, M., de Freitas, R. C., dos Santos, W. P., da Silva, W. W. A., Rodrigues, M. C. A., & Conde, E. F. Q. (2019). Exploratory study of the effect of binaural beat stimulation on the EEG activity pattern in resting state using artificial neural networks. *Cognitive Systems Research*, 54, 1-20.
- de Freitas, R. C., Alves, R., da Silva Filho, A. G., de Souza, R. E., Bezerra, B. L., & dos Santos, W. P. (2019). Electromyography-controlled car: A proof of concept based on surface electromyography, Extreme Learning Machines and low-cost open hardware. *Computers & Electrical Engineering*, 73, 167-179.
- de Lima, S. M., da Silva-Filho, A. G., & dos Santos, W. P. (2016). Detection and classification of masses in mammographic images in a multi-kernel approach. *Computer Methods and Programs in Biomedicine*, 134, 11–29.
- de Santana, M. A., Pereira, J. M. S., da Silva, F. L., de Lima, N. M., de Sousa, F. N., de Arruda, G. M. S., ... & dos Santos, W. P. (2018). Breast cancer diagnosis based on mammary thermography and extreme learning machines. *Research on Biomedical Engineering*, 34(1), 45-53.
- dos Santos, W. P., De Assis, F. M., De Souza, R. E., Mendes, P. B., & De Souza Monteiro, H. S., Alves, H. D. (2009). A Dialectical Method to Classify Alzheimer's Magnetic Resonance Images. *Evolutionary Computation*, 473.
- dos Santos, W. P., de Assis, F. M., de Souza, R. E., Santos, D., & Filho, P. B. (2008). Evaluation of Alzheimer's disease by analysis of MR images using Objective Dialectical Classifiers as an alternative to ADC maps. In *2008 30th Annual International Conference of the IEEE Engineering in Medicine and Biology Society* (pp. 5506–5509).
- dos Santos, W. P., de Souza, R. E., & dos Santos Filho, P. B. (2007). Evaluation of Alzheimer's disease by analysis of MR images using multilayer perceptrons and Kohonen SOM classifiers as an alternative to the ADC maps. In *2007 29th Annual International Conference of the IEEE Engineering in Medicine and Biology Society* (pp. 2118–2121).
- Faurholt-Jepsen, M., Busk, J., Frost, M., Vinberg, M., Christensen, E. M., Winther, O., ... Kessing, L. V. (2016). Voice analysis as an objective state marker in bipolar disorder. *Transl Psychiatry*, 6(7), e856-8. <https://doi.org/10.1038/tp.2016.123>
- Gonçalves, D. M., Stein, A. T., & Kapczinski, F. (2008). Avaliação de desempenho do Self-Reporting Questionnaire como instrumento de rastreamento psiquiátrico: Um estudo comparativo com o Structured Clinical Interview for DSM-IV-TR. *Cadernos de Saude Publica*, 24(2), 380–390. <https://doi.org/10.1590/S0102-311X2008000200017>
- Hamilton, M. (1960). A RATING SCALE FOR DEPRESSION. *J. Neurol. Neurosurg. Psychiat.*, 23, 56–62.
- Hasan, R., Jamil, M., Rabbani, G., & Rahman, S. (2004). Speaker Identification Using Mel Frequency Cepstral Coefficients. *3rd International Conference on Electrical & Computer Engineering ICECE 2004*, (December), 565–568.
- Hashim, N. W., Wilkes, M., Salomon, R., Meggs, J., & France, D. J. (2016). Evaluation of Voice Acoustics as

## Detection of Major Depressive Disorder Using Vocal Acoustic Analysis and Machine Learning

- Predictors of Clinical Depression Scores. *Journal of Voice*. <https://doi.org/10.1016/j.jvoice.2016.06.006>
- Higuchi, M., Tokuno, S., Nakamura, M., & Shinohara, S. (2018). Classification of bipolar disorder, major depressive disorder, and healthy state using voice. *Asian Journal of Pharmaceutical and Clinical Research*, *11*(3), 89–93. <https://doi.org/10.22159/ajpcr.2018.v11s3.30042>
- Hönig, F., Batliner, A., Nöth, E., Schnieder, S., & Krajewski, J. (2014). Automatic modelling of depressed speech: Relevant features and relevance of gender. *Proceedings of the Annual Conference of the International Speech Communication Association, INTERSPEECH*, (444), 1248–1252.
- Iwabuchi, S. J., Liddle, P. F., & Palaniyappan, L. (2013). Clinical Utility of Machine-Learning Approaches in Schizophrenia: Improving Diagnostic Confidence for Translational Neuroimaging. *Frontiers in Psychiatry*, *4*(August), 1–9. <https://doi.org/10.3389/fpsy.2013.00095>
- Jiang, H., Hu, B., Liu, Z., Wang, G., Zhang, L., Li, X., & Kang, H. (2018). Detecting Depression Using an Ensemble Logistic Regression Model Based on Multiple Speech Features. *Computational and Mathematical Methods in Medicine*, 2018. <https://doi.org/10.1155/2018/6508319>
- Jiang, H., Hu, B., Liu, Z., Yan, L., Wang, T., Liu, F., ... Li, X. (2017). Investigation of different speech types and emotions for detecting depression using different classifiers. *Speech Communication*, *90*, 39–46. <https://doi.org/10.1016/j.specom.2017.04.001>
- Low, L. S. A., Maddage, N. C., Lech, M., Sheeber, L. B., & Allen, N. B. (2011). Detection of clinical depression in adolescents' speech during family interactions. *IEEE Transactions on Biomedical Engineering*, *58*(3 PART 1), 574–586. <https://doi.org/10.1109/TBME.2010.2091640>
- Maxhuni, A., Muñoz-meléndez, A., Osmani, V., Perez, H., Mayora, O., & Morales, E. F. (2016). Classification of bipolar disorder episodes based on analysis of voice and motor activity of patients. *Pervasive and Mobile Computing*, *31*(1), 50–66. <https://doi.org/10.1016/j.pmcj.2016.01.008>
- Miguel, E. C., Gentil, V., & Gattaz, W. F. (2011). *Clínica Psiquiátrica*. Barueri: Manole.
- Mitra, V., & Shriberg, E. (2015). Effects of Feature Type, Learning Algorithm and Speaking Style for Depression Detection from Speech. *IEEE*, 4774–4778.
- Mundt, J. C., Snyder, P. J., Cannizzaro, M. S., Chappie, K., & Geralts, D. S. (2007). Voice acoustic measures of depression severity and treatment response collected via interactive voice response (IVR) technology. *Journal of Neurolinguistics*, *20*, 50–64. <https://doi.org/10.1016/j.jneuroling.2006.04.001>
- Mundt, J. C., Vogel, A. P., Feltner, D. E., & Lenderking, W. R. (2012). Vocal Acoustic Biomarkers of Depression Severity and Treatment Response. *Biological Psychiatry*, *72*(7), 580–587. <https://doi.org/10.1016/j.biopsych.2012.03.015>
- Ooi, K. E. B., Lech, M., & Brian Allen, N. (2013). Multichannel Weighted Speech Classification System for Prediction of Major Depression in Adolescents. *IEEE Transactions on Biomedical Engineering*, *60*(2), 497–506. <https://doi.org/10.1016/j.bspc.2014.08.006>
- Rodrigues, A. L., de Santana, M. A., Azevedo, W. W., Bezerra, R. S., Barbosa, V. A., de Lima, R. C., & dos Santos, W. P. (2019). Identification of mammary lesions in thermographic images: feature selection study using genetic algorithms and particle swarm optimization. *Research on Biomedical Engineering*, *35*(3), 213–222.
- Sadock, B., Sadock, V., & Ruiz, P. (2017). *Compêndio de Psiquiatria: Ciência do Comportamento e Psiquiatria Clínica* (11.). Porto Alegre: Artmed.
- Santos, K. O. B., Araújo, T. M., Pinhoa, P. S., & Silva, A. C. C. (2010). Avaliação de um Instrumento de Mensuração

## Detection of Major Depressive Disorder Using Vocal Acoustic Analysis and Machine Learning

de Morbidade Psíquica. *Revista Baiana de Saúde Pública*, 34(3), 544–560.

Vanello, N., Guidi, A., Gentili, C., Werner, S., Bertschy, G., Valenza, G., ... Scilingo, E. P. (2012). Speech analysis for mood state characterization in bipolar patients. In *34th Annual International Conference of the IEEE EMBS* (pp. 2104–2107).

Weinberger, A. H., Gbedemah, M., Martinez, A. M., Nash, D., Galea, S., & Goodwin, R. D. (2017). Trends in depression prevalence in the USA from 2005 to 2015: widening disparities in vulnerable groups. *Psychological Medicine*, 1–10. <https://doi.org/10.1017/S0033291717002781>

World Health Organization. (2017). *Depression and Other Common Mental Disorders Global Health Estimates*. Geneva, Switzerland.

World Health Organization. (2018). Depression. Retrieved November 11, 2019, from <https://www.who.int/en/news-room/fact-sheets/detail/depression>
